# Supplementary material for: MiR-93/miR-375: Diagnostic Potential, Aggressiveness Correlation and Common Target Genes in Prostate Cancer
Source: PubMed Central journal article supplement (PMC7460886; doi:10.3390/ijms21165667), 2020-08-07
Supplement: ijms-21-05667-s001.pdf [file ijms-21-05667-s001.pdf]

**Table S1.** MicroRNAs and reference genes used for real-time qPCR analyses.

| miRNA /<br>reference<br>gene name | miRBase ID <sup>a</sup> /<br>NCBI ID <sup>b</sup> | miRBase <sup>a</sup> /<br>NCBI<br>Accession<br>No. <sup>b</sup> | Sequence<br>Primer Forward (5' – 3')<br>Primer Reverse (5' – 3')                                    | Chromosome<br>Location               | miRNA<br>Gene<br>Family |
|-----------------------------------|---------------------------------------------------|-----------------------------------------------------------------|-----------------------------------------------------------------------------------------------------|--------------------------------------|-------------------------|
| <b>miRNAs</b>                     |                                                   |                                                                 |                                                                                                     |                                      |                         |
| miR-21                            | hsa-miR-21-5p                                     | 0000076                                                         | UAGCUUAUCAGACUGAUGUUGA<br>5' - GCAGTAGCTTATCAGACTGATG - 3'<br>5' - GGTCCAGTTTTTTTTTTTTTTTCAAC - 3'  | chr17:<br>59841266-<br>59841337 [+]  | miR-21                  |
| miR-27b                           | hsa-miR-27b-5p                                    | 0004588                                                         | AGAGCUUAGCUGAUUGGUGAAC<br>5' - GAGAGCTTAGCTGATTGGTG - 3'<br>5' - GGTCCAGTTTTTTTTTTTTTTTGTTT - 3'    | chr9: 95085445-<br>95085541 [+]      | miR-27                  |
| miR-93                            | hsa-miR-93-5p                                     | 0000093                                                         | CAAAGUGCUGUUCGUGCAGGUAG<br>5' - GCAAAGTGCTGTTCTGTG - 3'<br>5' - GTCCAGTTTTTTTTTTTTTTTCTACCT - 3'    | chr7:<br>100093768-<br>100093847 [-] | miR-17                  |
| miR-141                           | hsa-miR-141-3p                                    | 0000432                                                         | UAACACUGUCUGGUAAGAUGG<br>5' - CGCAGTAACACTGTCTGGT - 3'<br>5' - GTCCAGTTTTTTTTTTTTTTTCCATCT - 3'     | chr12: 6964097-<br>6964191 [+]       | miR-8                   |
| miR-182                           | hsa-miR-182-5p                                    | 0000259                                                         | UUUGGCAAUGGUAGAACUCACACU<br>5' - GTTTGGAATGGTAGAACTCA - 3'<br>5' - GGTCCAGTTTTTTTTTTTTTTTAGTGT - 3' | chr7:<br>129770383-<br>129770492 [-] | miR-182                 |
| miR-205                           | hsa-miR-205-5p                                    | 0000266                                                         | UCCUUCAUUCCACCGGAGUCUG<br>5' - CCTTCATTCACCGGAGT - 3'<br>5' - GGTCCAGTTTTTTTTTTTTTTTCAGA - 3'       | chr1:<br>209432133-<br>209432242 [+] | miR-205                 |
| miR-221                           | hsa-miR-221-5p                                    | 0004568                                                         | ACCUGGCAUACAAUGUAGAUUU<br>5' - GCAGACCTGGCATAACAATG - 3'<br>5' - GGTCCAGTTTTTTTTTTTTTTAAATCTAC - 3' | chrX:<br>45746157-<br>45746266 [-]   | miR-221                 |
| miR-375                           | hsa-miR-375                                       | 0000728                                                         | GCGACGAGCCCCUCGCACAAACC<br>5' - AGTTTGTTTCGTTCCGGCTC - 3'<br>5' - GGTCCAGTTTTTTTTTTTTTTTTCAC - 3'   | chr2:<br>219001645-<br>219001708 [-] | miR-375                 |
| let-7a                            | hsa-let-7a-1                                      | 0000062                                                         | UGAGGUAGUAGGUUGUAGUU<br>5' - GCAGTGAGGTAGTAGTTG - 3'<br>5' - GGTCCAGTTTTTTTTTTTTTTAACTATAC - 3'     | chr9:<br>94175957-<br>94176036 [+]   | let-7                   |

| Reference gene |                              |                     |                                          |       |
|----------------|------------------------------|---------------------|------------------------------------------|-------|
|                |                              |                     | GTGCTCGCTTCGGCAGCACATATACTAAAATTGGAACGAT |       |
|                |                              |                     | ACAGAGAAGATTAGCATGGCCCCTGCGCAAGGATGACAC  |       |
| <b>RNU6</b>    | <b>RNU6<br/>(SNORD6. U6)</b> | 004394 <sup>b</sup> | GCAAATTCGTGAAGCGTTCCATATTT               | 15q23 |
|                |                              |                     | 5' - CGCTTCGGCAGCACATATAC - 3'           |       |
|                |                              |                     | 5' - AGGGGCCATGCTAATCTTCT - 3'           |       |

<sup>a</sup> - Sanger Institute. Manchester. UK; <http://www.mirbase.org>

<sup>b</sup> - National Center of Biotechnology Information (NCBI) Reference Sequence Number; <https://www.ncbi.nlm.nih.gov/nucleotide/>

**Table S2.** Spearman rank correlation coefficients ( $r_s$ ) between clinicopathological factors and the examined microRNAs in all tissues ( $n = 54$ ) and serum ( $n = 102$ ) samples. The significantly differentially expressed miRNAs and correlations are highlighted in **bold** and indicated as: \*\*\*  $p < 0.0001$ , \*\*  $p < 0.0005$ , \*  $p < 0.005$ ; the correlation strength is marked with an appropriate color, the darker the color, the greater the relationship between variables.

|                       |             | Serum-derived miRNAs |               |            |               |                |                 |                 |               |                |                 |                 |        |
|-----------------------|-------------|----------------------|---------------|------------|---------------|----------------|-----------------|-----------------|---------------|----------------|-----------------|-----------------|--------|
| $r_s$                 |             | Age                  | GS            | PSA(ng/mL) | miR-21        | miR-27b        | miR-93          | miR-141         | miR-182       | miR-205        | miR-221         | miR-375         | let-7a |
| Tissue-derived miRNAs | Age         | -                    | 0.267         | 0.174      | -0.045        | -0.247         | 0.035           | 0.171           | 0.202         | 0.034          | 0.022           | 0.221           | 0.106  |
|                       | GS          | 0.101                | -             | 0.421      | 0.157         | 0.054          | <b>0.511**</b>  | 0.299           | <b>0.460*</b> | 0.053          | 0.344           | <b>0.563**</b>  | 0.276  |
|                       | PSA (ng/mL) | 0.341                | 0.094         | -          | 0.124         | -0.276         | 0.172           | 0.146           | 0.042         | 0.131          | -0.059          | -0.022          | -0.212 |
|                       | miR-21      | 0.276                | -0.306        | 0.172      | -             | 0.161          | 0.388           | 0.107           | 0.354         | -0.023         | -0.050          | 0.256           | 0.069  |
|                       | miR-27b     | 0.505                | -0.277        | 0.416      | <b>0.602*</b> | -              | 0.310           | 0.181           | 0.322         | 0.328          | 0.111           | <b>0.442*</b>   | 0.360  |
|                       | miR-93      | 0.342                | 0.401         | 0.174      | 0.271         | 0.436          | -               | 0.383           | <b>0.454*</b> | 0.035          | 0.211           | <b>0.678***</b> | 0.201  |
|                       | miR-141     | 0.156                | 0.176         | 0.485      | 0.333         | 0.331          | <b>0.681**</b>  | -               | 0.229         | 0.005          | 0.032           | <b>0.445*</b>   | 0.100  |
|                       | miR-182     | 0.081                | 0.120         | 0.524      | 0.217         | 0.363          | 0.407           | <b>0.643**</b>  | -             | 0.159          | -0.015          | <b>0.447*</b>   | 0.275  |
|                       | miR-205     | 0.234                | -0.344        | 0.283      | 0.249         | <b>0.586*</b>  | 0.182           | 0.255           | 0.099         | -              | -0.016          | 0.091           | 0.037  |
|                       | miR-221     | 0.329                | -0.117        | 0.195      | 0.238         | <b>0.652**</b> | <b>0.644**</b>  | 0.441           | 0.451         | <b>0.635**</b> | -               | 0.435           | -0.056 |
|                       | miR-375     | 0.314                | <b>0.560*</b> | 0.359      | 0.249         | 0.372          | <b>0.850***</b> | <b>0.733***</b> | 0.465         | 0.169          | 0.456           | -               | 0.089  |
|                       | let-7a      | 0.134                | -0.140        | 0.140      | 0.240         | 0.424          | <b>0.569*</b>   | 0.470           | 0.466         | <b>0.574*</b>  | <b>0.798***</b> | 0.409           | -      |

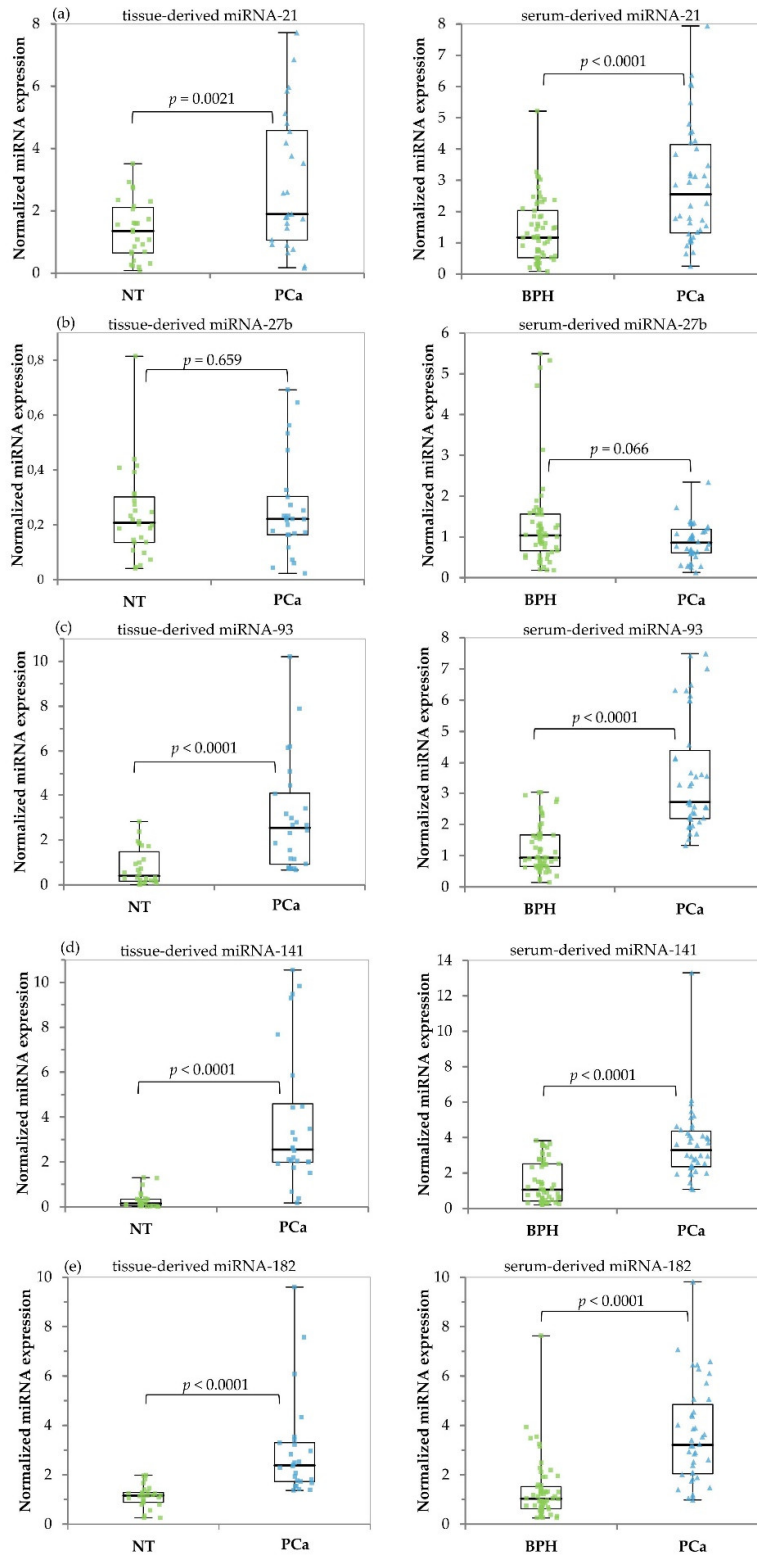

**Figure S1.** Expression of nine miRNAs (a – i) analyzed in tissue- (NT = 28, PCa = 26) and serum-derived (BPH = 62, PCa = 40) samples. Normalized miRNA expression data are given as box- and whisker plots. Boxes represent the lower and upper quartiles with medians, while whiskers illustrate the ranges of the miRNAs expression levels.

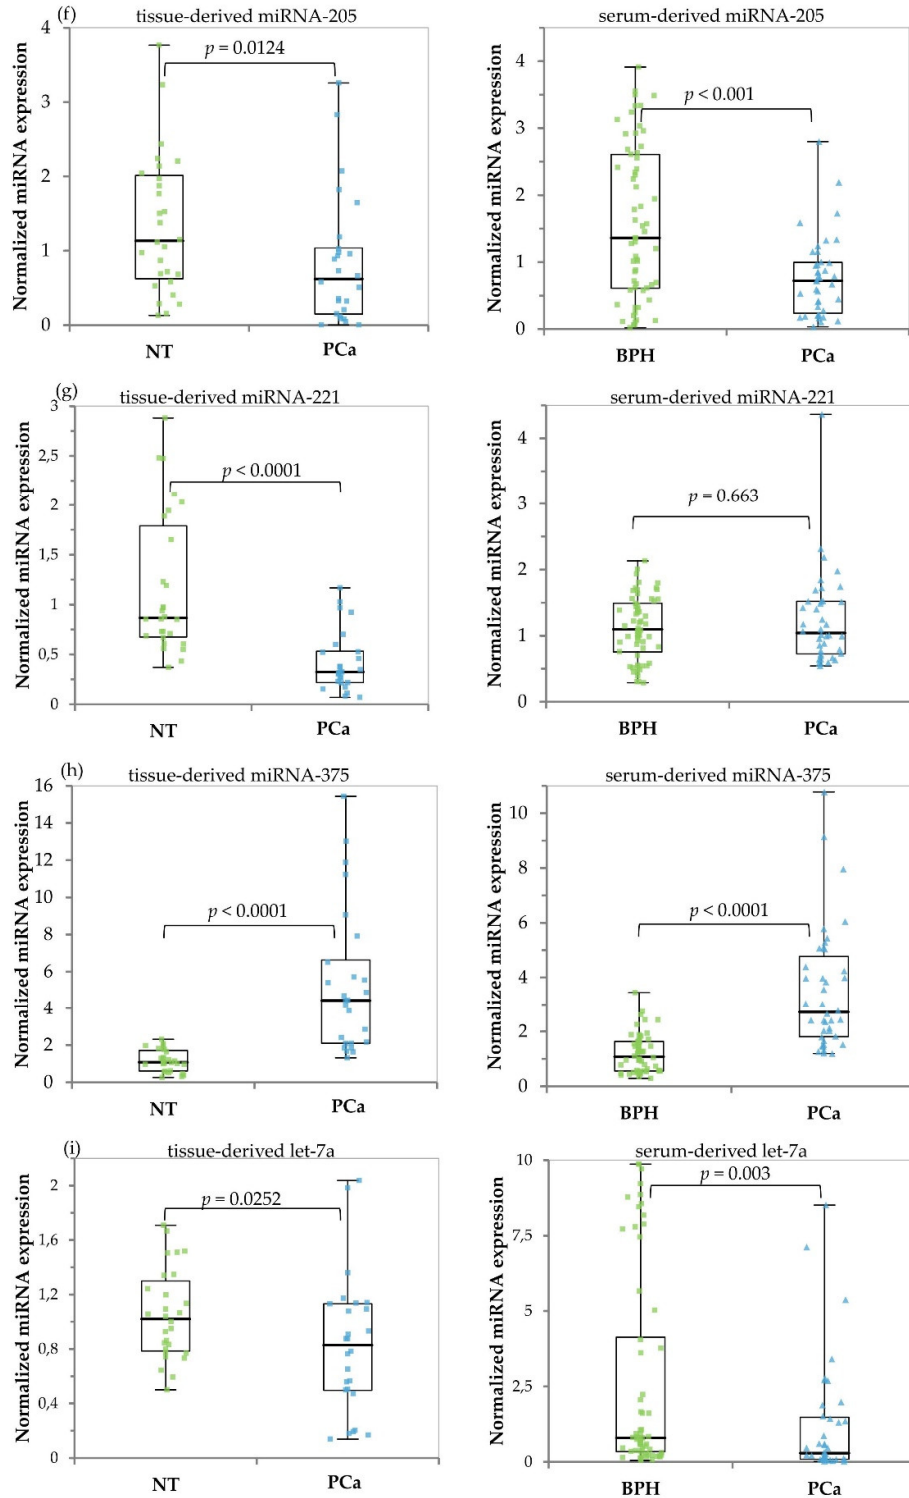

**Figure S1** continued. Expression of nine miRNAs (a-i) analyzed in tissue- (NT = 28, PCa = 26) and serum-derived (BPH = 62, PCa = 40) samples. Normalized miRNA expression data are given as box- and whisker plots. Boxes represent the lower and upper quartiles with medians, while whiskers illustrate the ranges of the miRNAs expression levels.

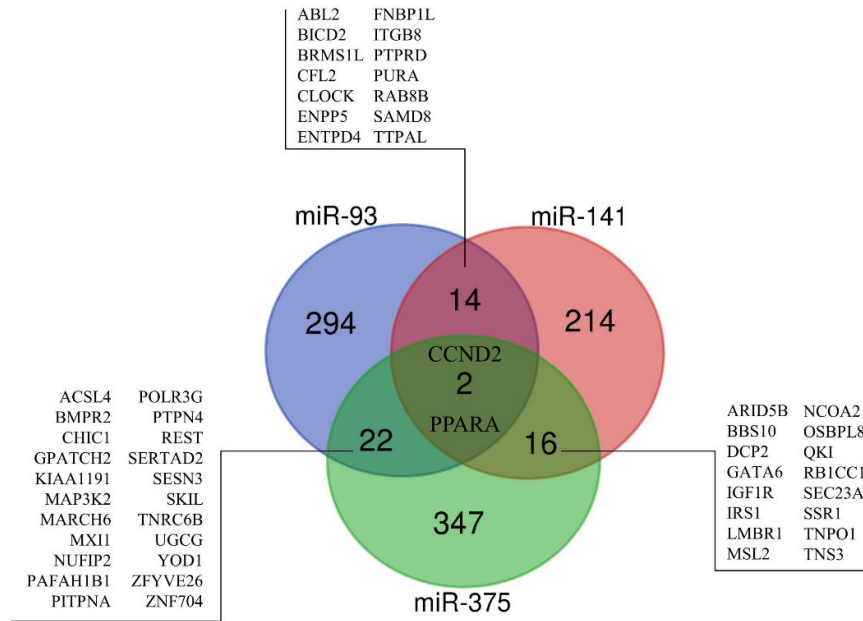

**Figure S2.** A Venn diagram of the relationships between and among miR-93, miR-141, and miR-375, indicating two common target genes (*CCND2* and *PPARA*).

**Table S3.** Target genes for miR-93 and/or miR-375 described in The Human Protein Atlas database as PCa prognostic and unprognostic [64].

| Ensemble        | Gene     | Gene description                                                   | Chromosome (position)       | Pathology prognostics   | <i>p</i> value |
|-----------------|----------|--------------------------------------------------------------------|-----------------------------|-------------------------|----------------|
| ENSG00000117020 | AKT3     | AKT serine/threonine kinase 3                                      | 1<br>(243488233–243851079)  | Unprognostic            | 0.137          |
| ENSG00000110092 | CCND1    | Cyclin D1                                                          | 11<br>(69641087–69654474)   | Unprognostic            | 0.044          |
| ENSG00000118971 | CCND2    | Cyclin D2                                                          | 12<br>(4273772–4305350)     | Unprognostic            | 0.175          |
| ENSG00000140443 | IGF1R    | Insulin like growth factor 1 receptor                              | 15<br>(98648971–98964530)   | Unprognostic            | 0.162          |
| ENSG00000169967 | MAP3K2   | Mitogen-activated protein kinase kinase 2                          | 2<br>(127298730–127388465)  | Unprognostic            | 0.139          |
| ENSG00000100030 | MAPK1    | Mitogen-activated protein kinase 1                                 | 22<br>(21754500–21867680)   | Unprognostic            | 0.104          |
| ENSG00000119950 | MXI1     | MAX interactor 1, dimerization protein                             | 10<br>(110207605–110287365) | Prognostic unfavourable | <0.0001        |
| ENSG00000007168 | PAFAH1B1 | Platelet activating factor acetylhydrolase 1b regulatory subunit 1 | 17<br>(2593210–2685615)     | Unprognostic            | 0.058          |

|                 |         |                                         |                                |              |       |
|-----------------|---------|-----------------------------------------|--------------------------------|--------------|-------|
| ENSG00000114062 | UBE3A   | Ubiquitin protein<br>ligase E3A         | 15<br>(25333728-<br>25439056)  | Unprognostic | 0.048 |
| ENSG00000180667 | YOD1    | YOD1<br>deubiquitinase                  | 1<br>(207043849-<br>207052980) | Unprognostic | 0.010 |
| ENSG00000072121 | ZFYVE26 | Zinc finger FYVE-<br>type containing 26 | 14<br>(67727374-<br>67816590)  | Unprognostic | 0.037 |

**Table S4.** GO terms and KEGG pathways for miR-93 and miR-375 PCa-related target genes [64] based on in silico through DAVID [65] and DIANA miRpath v.3 database [66].

| No. | KEGG pathway Category                                             |                                                                                             | Genes                                              | p value |
|-----|-------------------------------------------------------------------|---------------------------------------------------------------------------------------------|----------------------------------------------------|---------|
| 1   | hsa04068:FoxO signaling pathway                                   |                                                                                             | MAPK1, IGF1R, CCND1, CCND2, AKT3                   | <0.0001 |
| 2   | hsa04151:PI3K-Akt signaling pathway                               |                                                                                             |                                                    | <0.0001 |
| 3   | hsa04510:Focal adhesion                                           |                                                                                             |                                                    | <0.0001 |
| 4   | hsa04917:Prolactin signaling pathway                              |                                                                                             | MAPK1, CCND1, CCND2, AKT3                          | <0.0001 |
| 5   | hsa05200:Pathways in cancer                                       |                                                                                             | MAPK1, IGF1R, CCND1, AKT3                          | 0.008   |
| 6   | hsa05203:Viral carcinogenesis                                     |                                                                                             | MAPK1, CCND1, CCND2, UBE3A                         | 0.001   |
| 7   | hsa05205:Proteoglycans in cancer                                  |                                                                                             | MAPK1, IGF1R, CCND1, AKT3                          | 0.001   |
| 8   | hsa05214:Glioma                                                   |                                                                                             |                                                    | <0.0001 |
| 9   | hsa05215:Prostate cancer                                          |                                                                                             |                                                    | <0.0001 |
| 10  | hsa05218:Melanoma                                                 |                                                                                             |                                                    | <0.0001 |
| 11  | hsa04010:MAPK signaling pathway                                   |                                                                                             | MAPK1, MAP3K2, AKT3                                | 0.033   |
| 12  | hsa04014:Ras signaling pathway                                    |                                                                                             | MAPK1, IGF1R, AKT3                                 | 0.026   |
| 13  | hsa04015:Rap1 signaling pathway                                   |                                                                                             |                                                    | 0.023   |
| 14  | hsa04066:HIF-1 signaling pathway                                  |                                                                                             |                                                    | 0.005   |
| 15  | hsa04152:AMPK signaling pathway                                   |                                                                                             | IGF1R, CCND1, AKT3                                 | 0.008   |
| 16  | hsa04550:Signaling pathways regulating pluripotency of stem cells |                                                                                             | MAPK1, IGF1R, AKT3                                 | 0.011   |
| 17  | hsa04630:Jak-STAT signaling pathway                               |                                                                                             | CCND1, CCND2, AKT3                                 | 0.011   |
| 18  | hsa04914:Progesterone-mediated oocyte maturation                  |                                                                                             | MAPK1, IGF1R, AKT3                                 | 0.004   |
| 19  | hsa04919:Thyroid hormone signaling pathway                        |                                                                                             | MAPK1, CCND1, AKT3                                 | 0.007   |
| 20  | hsa05161:Hepatitis B                                              |                                                                                             |                                                    | 0.011   |
| 21  | hsa05162:Measles                                                  |                                                                                             | CCND1, CCND2, AKT3                                 | 0.010   |
| 22  | hsa05166:HTLV-I infection                                         |                                                                                             |                                                    | 0.033   |
| 23  | hsa05210:Colorectal cancer                                        |                                                                                             | MAPK1, CCND1, AKT3                                 | 0.002   |
| 24  | hsa05212:Pancreatic cancer                                        |                                                                                             |                                                    | 0.002   |
| 25  | hsa05213:Endometrial cancer                                       |                                                                                             |                                                    | 0.002   |
| 26  | hsa05220:Chronic myeloid leukemia                                 |                                                                                             |                                                    | 0.003   |
| 27  | hsa05221:Acute myeloid leukemia                                   |                                                                                             |                                                    | 0.002   |
| 28  | hsa05223:Non-small cell lung cancer                               |                                                                                             |                                                    | 0.002   |
| 29  | hsa05216:Thyroid cancer                                           |                                                                                             | MAPK1, CCND1                                       | 0.033   |
| 30  | hsa05219:Bladder cancer                                           |                                                                                             |                                                    | 0.047   |
| No. | Category                                                          | GO term                                                                                     | Genes                                              | p value |
| 1   | BP                                                                | GO:0006468~protein phosphorylation                                                          | MAPK1, CCND1, MAP3K2, AKT3                         | 0.002   |
| 2   | BP                                                                | GO:0007049~cell cycle                                                                       | MAPK1, CCND1, CCND2                                | 0.007   |
| 3   | BP                                                                | GO:0008284~positive regulation of cell proliferation                                        | MAPK1, IGF1R, CCND2                                | 0.030   |
| 4   | BP                                                                | GO:0030968~endoplasmic reticulum unfolded protein response                                  | CCND1, YOD1                                        | 0.026   |
| 5   | BP                                                                | GO:0033598~mammary gland epithelial cell proliferation                                      | MAPK1, CCND1                                       | 0.005   |
| 6   | BP                                                                | GO:0043627~response to estrogen                                                             |                                                    | 0.038   |
| 7   | BP                                                                | GO:0045737~positive regulation of cyclin-dependent protein serine/threonine kinase activity | CCND1, CCND2                                       | 0.014   |
| 8   | CC                                                                | GO:0005829~cytosol                                                                          | MAPK1, CCND1, CCND2, UBE3A, MAP3K2, PAFAH1B1, YOD1 | 0.004   |
| 9   | CC                                                                | GO:0000307~cyclin-dependent protein kinase holoenzyme complex                               | CCND1, CCND2                                       | 0.008   |



|    |    |                                                     |                                                                                |       |
|----|----|-----------------------------------------------------|--------------------------------------------------------------------------------|-------|
| 10 | MF | GO:0005515~protein binding                          | MAPK1, IGF1R, CCND1, CCND2, UBE3A, MAP3K2, ZFYVE26, PAFAH1B1, YOD1, MXI1, AKT3 | 0.001 |
| 11 | MF | GO:0004672~protein kinase activity                  | CCND1, MAP3K2, AKT3                                                            | 0.018 |
| 12 | MF | GO:0004674~protein serine/threonine kinase activity | MAPK1, MAP3K2, AKT3                                                            | 0.020 |
| 13 | MF | GO:0019901~protein kinase binding                   | CCND1, CCND2, MAP3K2                                                           | 0.020 |

Abbreviations: KEGG, Kyoto Encyclopedia of Genes and Genomes; GO, Gene Ontology; BP, biological processes; CC, cell component; MF, molecular function.

**Table S5.** miRNAs targets among 11 analyzed genes predicted by TargetScan [67].

| Gene                                                                    | miRNA   | Position in the UTR | Seed match | CS    | P <sub>ct</sub> |
|-------------------------------------------------------------------------|---------|---------------------|------------|-------|-----------------|
| <b>AKT3</b> ENST00000366539.1<br>3' UTR length: 5530                    | miR-93  | 1142–1148           | 7mer-m8    | -0.16 | 0.74            |
| <b>CCND1</b> ENST00000227507.2<br>3' UTR length: 3192                   | miR-93  | 583–589             | 7mer-1A    | -0.03 | 0.2             |
|                                                                         |         | 1014–1020           | 7mer-m8    | -0.21 | 0.74            |
| <b>CCND2</b> ENST00000261254.3<br>3' UTR length: 5347                   | miR-93  | 968–974             | 7mer-m8    | -0.2  | 0.74            |
|                                                                         | miR-375 | 328–334             | 7mer-1A    | -0.08 | 0.35            |
| <b>IGF1R</b> ENST00000268035.6<br>3' UTR length: 7088                   | miR-93  | 3998–4004           | 7mer-1A    | -0.01 | <0.1            |
|                                                                         |         | 2276–2282           | 7mer-1A    | -0.01 | 0.29            |
|                                                                         |         | 2993–2999           | 7mer-1A    | -0.01 | <0.1            |
| <b>MAP3K2</b> ENST00000409947.1<br>3' UTR length: 8910                  | miR-93  | 65–71               | 7mer-m8    | -0.18 | 0.74            |
|                                                                         |         | 265–272             | 8mer       | -0.18 | 0.96            |
|                                                                         |         | 6553–6559           | 7mer-m8    | -0.2  | 0.68            |
|                                                                         |         | 8869–8875           | 7mer-m8    | -0.14 | 0.74            |
|                                                                         |         | 1503–1509           | 7mer-1A    | -0.01 | <0.1            |
|                                                                         |         | 3342–3348           | 7mer-m8    | -0.02 | <0.1            |
|                                                                         |         | 5996–6002           | 7mer-1A    | -0.01 | 0.17            |
|                                                                         |         | 2760–2766           | 7mer-1A    | -0.01 | 0.22            |
| <b>MAPK1</b> ENST00000215832.6<br>3' UTR length: 9750                   | miR-93  | 1552–1558           | 7mer-1A    | -0.01 | <0.1            |
|                                                                         |         | 445–452             | 8mer       | -0.23 | 0.96            |
|                                                                         |         | 414–420             | 7mer-1A    | -0.05 | 0.13            |
| <b>MXI1</b> ENST00000332674.5<br>3' UTR length: 4283                    | miR-93  | 7597–7603           | 7mer-m8    | -0.02 | <0.1            |
|                                                                         |         | 1356–1362           | 7mer-m8    | -0.15 | 0.74            |
|                                                                         |         | 1691–1697           | 7mer-1A    | -0.01 | 0.27            |
|                                                                         |         | 2830–2836           | 7mer-m8    | -0.02 | <0.1            |
|                                                                         |         | 130–136             | 7mer-1A    | -0.13 | 0.35            |
| <b>PAFAH1B1</b><br>ENST00000397195.5<br>3' UTR length: 3813             | miR-375 | 200–206             | 7mer-1A    | -0.16 | 0.35            |
|                                                                         |         | 2870–2877           | 8mer       | -0.16 | 0.89            |
| <b>PPAR<math>\alpha</math></b> ENST00000396000.2<br>3' UTR length: 8376 | miR-93  | 1249–1255           | 7mer-1A    | -0.05 | <0.1            |
|                                                                         |         | 416–422             | 7mer-m8    | -0.15 | <0.1            |
|                                                                         |         | 97–103              | 7mer-1A    | -0.01 | <0.1            |
|                                                                         |         | 620–626             | 7mer-m8    | -0.02 | <0.1            |
|                                                                         |         | 1969–1975           | 7mer-m8    | -0.02 | <0.1            |
| <b>UBE3A</b> ENST00000232165.3<br>3' UTR length: 1960                   | miR-375 | 4966–4972           | 7mer-m8    | -0.02 | <0.1            |
|                                                                         |         | 3040–3046           | 7mer-1A    | -0.07 | <0.1            |
| <b>YOD1</b> ENST00000315927.4<br>3' UTR length: 5182                    | miR-93  | 1637–1643           | 7mer-m8    | -0.07 | <0.1            |
|                                                                         |         | 218–224             | 7mer-1A    | -0.16 | 0.35            |
|                                                                         |         | 1138–1144           | 7mer-m8    | -0.13 | 0.2             |
|                                                                         |         | 3495–3502           | 8mer       | -0.24 | 0.94            |
| <b>ZFYVE26</b> ENST00000347230.4<br>3'UTR length: 1916                  | miR-93  | 1601–1607           | 7mer-m8    | -0.09 | <0.1            |
|                                                                         |         | 2217–2223           | 7mer-1A    | -0.03 | 0.17            |
|                                                                         |         | 85–91               | 7mer-1A    | -0.11 | 0.31            |
| <b>ZFYVE26</b> ENST00000347230.4<br>3'UTR length: 1916                  | miR-375 | 353–360             | 8mer       | -0.2  | 0.91            |
|                                                                         |         | 1659–1666           | 8mer       | -0.23 | 0.94            |
|                                                                         |         | 321–327             | 7mer-1A    | -0.14 | 0.35            |

Abbreviations: CS, the context++ score for a specific site is the sum of the contribution of 14 features [100]; P<sub>ct</sub>, probability of conserved targeting; 3' UTR, untranslated region; 8mer, an exact match to positions 2–8 of the mature miRNA (the seed + position 8) followed by an 'A'; 7mer-m8, an exact match to positions 2–8 of the mature miRNA (the seed + position 8); 7mer-A1, an exact match to positions 2–7 of the mature miRNA (the seed) followed by an 'A' [67].
